# Supplementary material for: Novel eutectogels derived from an ionic-liquid-based deep eutectic solvent as electrolytes for supercapacitors: synthesis and characterization
Source: Royal Society of Chemistry journal article supplement (doi:10.1039/d4nj03092c), 2024-01-01
Supplement: d4nj03092c1.pdf [file d4nj03092c1.pdf]

## Supplementary Information

# Novel Eutectogels Derived from an Ionic-Liquid-Based Deep Eutectic Solvent as Electrolytes for Supercapacitors: Synthesis and Characterization

Arindam Dutta,<sup>a,b</sup> Wade Millar,<sup>b</sup> Debbie S. Silvester,<sup>b</sup> and Tamal Banerjee<sup>a\*</sup>

<sup>a</sup>*Department of Chemical Engineering, Indian Institute of Technology Guwahati, Guwahati, Assam 781039, India.*

<sup>b</sup>*School of Molecular and Life Sciences, Curtin University, Perth, Western Australia 6845, Australia.*

**\*Corresponding author. Tel.: +91-361-2582266. Fax: +91-361-2582291. E-mail address: [tamalb@iitg.ac.in](mailto:tamalb@iitg.ac.in) (Tamal Banerjee).**

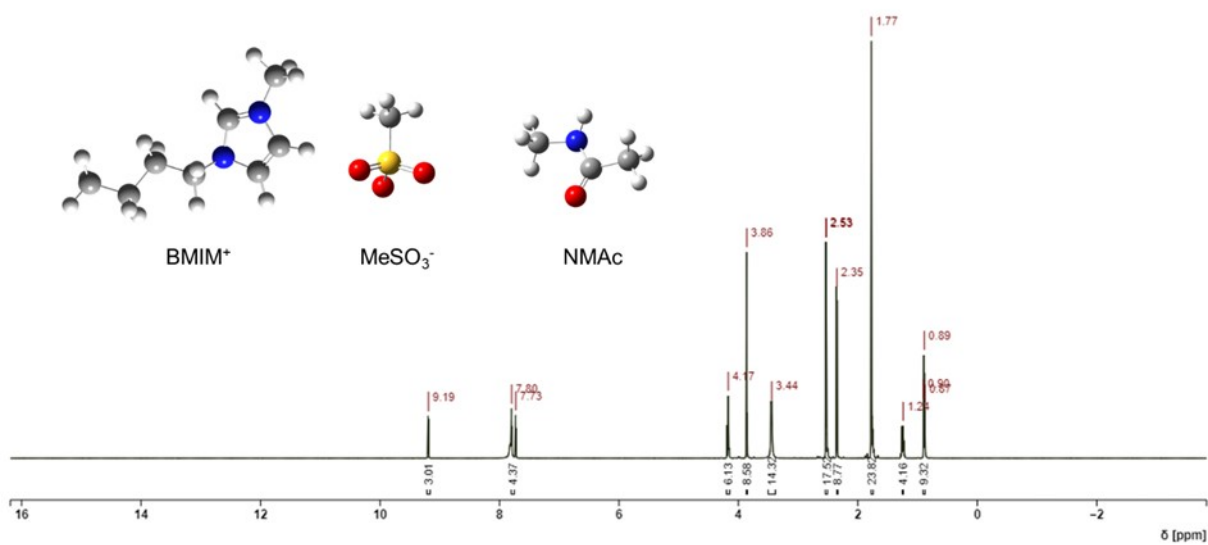

**Fig. S1.** <sup>1</sup>H NMR spectrum of the DES.

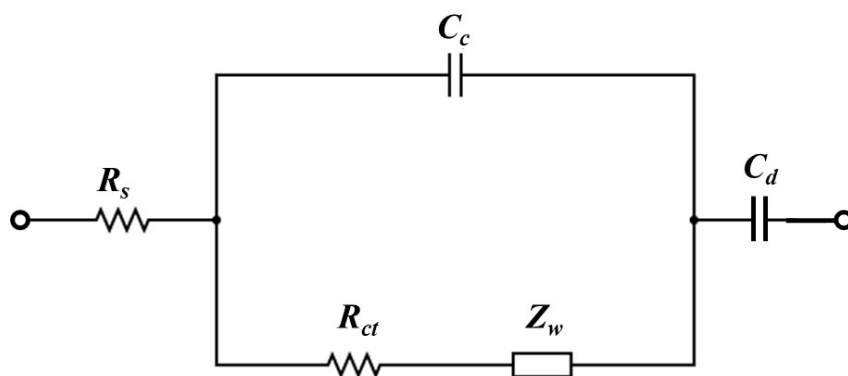

**Fig. S2.** Equivalent electrical circuit corresponding to a typical Nyquist plot obtained from EIS.

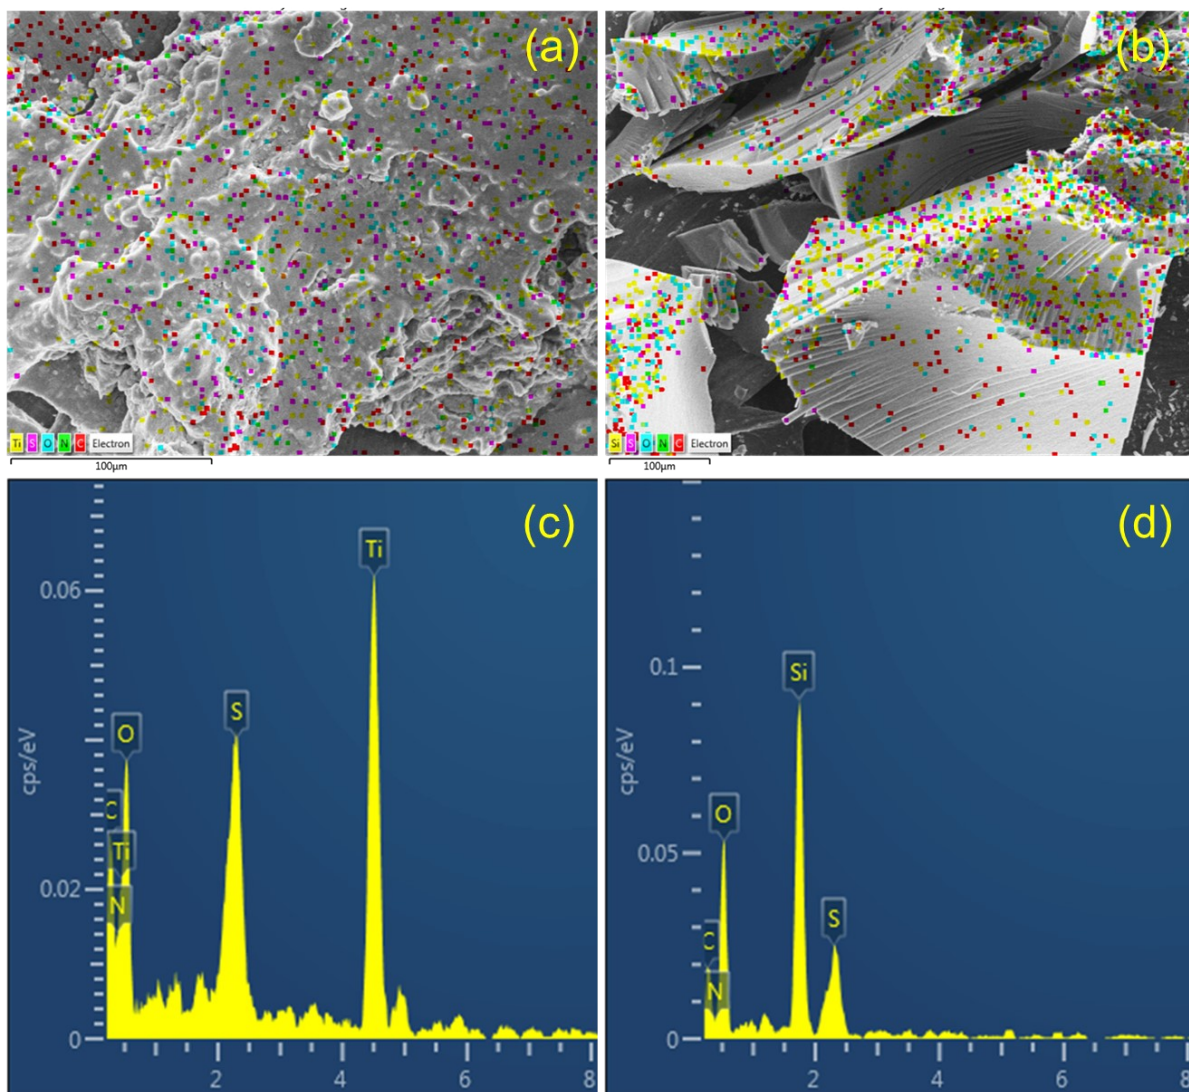

**Fig. S3.** Spot analyses of the (a) TIEGel and (b) SIEGel samples showing the spectral regions EDX is conducted on; EDX spectra of (c) TIEGel and (d) SIEGel showing the peaks corresponding to the different elements present in the samples.

**Table S1.** Comparison of OPW, specific capacitance, specific energy, specific power, and ionic conductivity of TIEGel and SIEGel with those of pertinent ionogels and eutectogels reported in similar works at room temperature.

| System                                                        | Electrodes / Working electrode      | OPW (V) | $C$ ( $F g^{-1}$ )             | $E$ ( $W h kg^{-1}$ ) | $P$ ( $kW kg^{-1}$ ) | $\sigma$ ( $mS cm^{-1}$ ) | Ref.      |
|---------------------------------------------------------------|-------------------------------------|---------|--------------------------------|-----------------------|----------------------|---------------------------|-----------|
| [BMIM][MeSO <sub>3</sub> ] + NMAc + TiO <sub>2</sub> (TIEGel) | rGO   rGO                           | 3       | 16.32 (5 mV s <sup>-1</sup> )  | 20.39                 | 3.31                 | 1.27                      | This work |
| [BMIM][MeSO <sub>3</sub> ] + NMAc + SiO <sub>2</sub> (SIEGel) | rGO   rGO                           | 3       | 2.25 (5 mV s <sup>-1</sup> )   | 2.81                  | 0.31                 | 0.09                      | This work |
| [BMIM][BF <sub>4</sub> ] + DMAA + TiO <sub>2</sub>            | carbon nanocage                     | ~3      | 176 (1 A g <sup>-1</sup> )     | -                     | -                    | 3.5                       | 1         |
| [BMIM][PF <sub>6</sub> ] + PEGMA + PEGDA + TiO <sub>2</sub>   | carbon nanocage                     | 3       | 172 (1 A g <sup>-1</sup> )     | -                     | -                    | 1.46                      | 2         |
| [BMIM][BF <sub>4</sub> ] + DMAA + MBAA + TiO <sub>2</sub>     | Activated carbon (AC)               | ~3      | 143 (1 A g <sup>-1</sup> )     | -                     | -                    | 3.5                       | 3         |
| [BMIM][BF <sub>4</sub> ] + HEMA + TiO <sub>2</sub>            | Au-Ti-coated AC                     | ~3      | 102 (5 mV s <sup>-1</sup> )    | -                     | -                    | 1.4                       | 4         |
| [EMIM][TFSI] + SiO <sub>2</sub>                               | glassy carbon                       | 2.5     | 7.5 ± 0.4*                     | -                     | -                    | 9.3 ± 0.5                 | 5         |
| [EMIM][TFSI] + SiO <sub>2</sub>                               | Vertically aligned carbon nanotubes | 3       | 430* (100 mV s <sup>-1</sup> ) | 0.1–0.5 <sup>†</sup>  | 10 <sup>‡</sup>      | -                         | 6         |
| [EMIM][TFSI] + SiO <sub>2</sub>                               | AC                                  | 2.5     | 20 (2 mV s <sup>-1</sup> )     | -                     | -                    | 1.5                       | 7         |
| [EMIM][TFSI] + SiO <sub>2</sub>                               | carbon monolith                     | 2.5     | 75 (10 mV s <sup>-1</sup> )    | -                     | -                    | -                         | 8         |
| [EMIM][TFSI] + DMDMS + SiO <sub>2</sub>                       | Si nanowires                        | 2.5     | 4                              | -                     | -                    | 3                         | 9         |
| ChCl + EG + HEMA + PEGDA                                      | Indium tin oxide (ITO)   ITO        | 1.5     | 33.3 (0.01 A g <sup>-1</sup> ) | 15.8                  | -                    | 5.7                       | 10        |
| ChCl + urea + glycerol + cellulose +                          | AC   AC                             | 2       | 76.6 (1 A g <sup>-1</sup> )    | 10.64                 | 0.5                  | 0.58                      | 11        |

|                                                                                |            |     |                                   |       |        |       |    |
|--------------------------------------------------------------------------------|------------|-----|-----------------------------------|-------|--------|-------|----|
| PAAM                                                                           |            |     |                                   |       |        |       |    |
| EG + urea + ChCl<br>+ZnCl <sub>2</sub> + silk<br>fiber                         | Zn   AC    | 1.4 | 342.8<br>(0.2 A g <sup>-1</sup> ) | 93.3  | -      | 12.31 | 12 |
| Zn(ClO <sub>4</sub> ) <sub>2</sub> + AM<br>+ H <sub>2</sub> O                  | Zn   N-rGO | 2.2 | 194.7<br>(0.8 A g <sup>-1</sup> ) | 117.5 | ~ 0.83 | 51.7  | 13 |
| EG + Zn(ClO <sub>4</sub> ) <sub>2</sub> +<br>H <sub>2</sub> O +SPEEK +<br>PAAM | Zn   AC    | 1.7 | 150.1<br>(0.3 A g <sup>-1</sup> ) | 66.83 | ~ 0.19 | 63.5  | 14 |

\*Areal capacitance ( $\mu\text{F cm}^{-2}$ )

†Areal energy density ( $\mu\text{W h cm}^{-2}$ )

‡Areal power density ( $\text{mW cm}^{-2}$ )

**Table S2.** Specific capacitance and specific energy of TIEGel and SIEGel at room temperature and scan rates of 5, 10, 25, 50, and 100 mV s<sup>-1</sup>.

| System | Scan rate<br>(mV s <sup>-1</sup> ) | <i>C</i><br>(F g <sup>-1</sup> ) | <i>C</i><br>(mF cm <sup>-2</sup> ) | <i>E</i><br>(W h kg <sup>-1</sup> ) |
|--------|------------------------------------|----------------------------------|------------------------------------|-------------------------------------|
| TIEGel | 5                                  | 16.32                            | 395.78                             | 20.39                               |
|        | 10                                 | 10.12                            | 245.41                             | 12.65                               |
|        | 25                                 | 4.99                             | 121.05                             | 6.24                                |
|        | 50                                 | 2.77                             | 67.30                              | 3.45                                |
|        | 100                                | 1.57                             | 38.09                              | 1.96                                |
| SIEGel | 5                                  | 2.25                             | 54.53                              | 2.81                                |
|        | 10                                 | 1.83                             | 44.37                              | 2.29                                |
|        | 25                                 | 0.96                             | 23.39                              | 1.21                                |
|        | 50                                 | 0.53                             | 12.99                              | 0.67                                |
|        | 100                                | 0.29                             | 6.97                               | 0.36                                |

**Table S3.** Specific capacitance and specific energy of TIEGel at scan rates of 5, 10, 25, 50, and 100 mV s<sup>-1</sup> and controlled temperatures of 25, 50, and 80 °C.

| Temperature (°C) | Scan rate (mV s <sup>-1</sup> ) | <i>C</i> (F g <sup>-1</sup> ) | <i>C</i> (mF cm <sup>-2</sup> ) | <i>E</i> (W h kg <sup>-1</sup> ) |
|------------------|---------------------------------|-------------------------------|---------------------------------|----------------------------------|
| 25               | 5                               | 8.49                          | 205.84                          | 10.61                            |
|                  | 10                              | 5.34                          | 129.47                          | 6.67                             |
|                  | 25                              | 2.33                          | 56.53                           | 2.91                             |
|                  | 50                              | 1.03                          | 24.98                           | 1.29                             |
|                  | 100                             | 0.35                          | 8.50                            | 0.44                             |
| 50               | 5                               | 16.39                         | 397.53                          | 20.49                            |
|                  | 10                              | 8.74                          | 212.06                          | 10.93                            |
|                  | 25                              | 4.24                          | 102.85                          | 5.30                             |
|                  | 50                              | 2.29                          | 55.44                           | 2.86                             |
|                  | 100                             | 0.98                          | 23.79                           | 1.23                             |
| 80               | 5                               | 25.81                         | 625.97                          | 32.26                            |
|                  | 10                              | 18.40                         | 446.39                          | 23.00                            |
|                  | 25                              | 10.79                         | 261.80                          | 13.49                            |
|                  | 50                              | 6.51                          | 157.82                          | 8.13                             |
|                  | 100                             | 3.39                          | 82.13                           | 4.23                             |

## References

- 1 X. Liu, O. O. Taiwo, C. Yin, M. Ouyang, R. Chowdhury, B. Wang, H. Wang, B. Wu, N. P. Brandon, Q. Wang and S. J. Cooper, *Advanced Science*, 2019, **6**, 1801337.
- 2 X. Liu, B. Wang, Z. Jin, H. Wang and Q. Wang, *J Mater Chem A Mater*, 2015, **3**, 15408–15412.
- 3 X. Liu, B. Wu, N. Brandon and Q. Wang, *Energy Technology*, 2017, **5**, 220–224.
- 4 X. Liu, B. He, Z. Wang, H. Tang, T. Su and Q. Wang, *Sci Rep*, 2014, **4**, 6673.
- 5 A. I. Horowitz and M. J. Panzer, *J Mater Chem*, 2012, **22**, 16534.
- 6 B. Hsia, J. Marschewski, S. Wang, J. Bin In, C. Carraro, D. Poulikakos, C. P. Grigoropoulos and R. Maboudian, *Nanotechnology*, 2014, **25**, 055401.
- 7 M. Brachet, T. Brousse and J. Le Bideau, *ECS Electrochemistry Letters*, 2014, **3**, A112–A115.
- 8 S. Zhu, P.-L. Taberna, N. Zhao and P. Simon, *Electrochem commun*, 2018, **96**, 6–10.
- 9 M. Brachet, D. Gaboriau, P. Gentile, S. Fantini, G. Bidan, S. Sadki, T. Brousse and J. Le Bideau, *J Mater Chem A Mater*, 2016, **4**, 11835–11843.
- 10 H. Qin and M. J. Panzer, *ChemElectroChem*, 2017, **4**, 2556–2562.
- 11 S. Hong, Y. Yuan, C. Liu, W. Chen, L. Chen, H. Lian and H. Liimatainen, *J Mater Chem C Mater*, 2020, **8**, 550–560.
- 12 Z. Li, X. Xu, Z. Jiang, J. Chen, J. Tu, X. Wang and C. Gu, *ACS Appl Mater Interfaces*, 2022, **14**, 44821–44831.
- 13 Y. Wu, Y. Deng, K. Zhang, J. Qiu, J. Wu and L. Yan, *ACS Appl Energy Mater*, 2022, **5**, 3013–3021.
- 14 H. Yang, J. Zhang, J. Yao, D. Zuo, J. Xu and H. Zhang, *J Power Sources*, 2022, **548**, 232070.
